# Supplementary material for: Isomerization of the methoxy radical revisited: the impact of water dimers
Source: Royal Society of Chemistry journal article supplement (doi:10.1039/c6cp04544h), 2016-01-01
Supplement: c6cp04544h1.pdf [file c6cp04544h1.pdf]

## Electronic Supporting Information

for

### **Isomerization of Methoxy Radical Revisited: Impact of Water Dimer**

Pradeep Kumar<sup>a</sup>, Partha Biswas<sup>b</sup> and Biman Bandyopadhyay<sup>a</sup>

<sup>a</sup>*Department of Chemistry, Malaviya National Institute of Technology Jaipur, J. L. N. Marg, Jaipur – 302017, India.*

<sup>b</sup>*Department of Chemistry, Scottish Church College, 1 & 3 Urquhart Square, Kolkata-700006, India.*

## Table of contents

| S. No | Caption                                                                                                                                                                                                                | Page No. |
|-------|------------------------------------------------------------------------------------------------------------------------------------------------------------------------------------------------------------------------|----------|
| 1     | Rate calculations                                                                                                                                                                                                      | 3        |
| 2     | <b>Table S1</b> Relative energies (kcal mol <sup>-1</sup> ) of all species with respect to the isolated reactants calculated using two different levels of theory                                                      | 5        |
| 3     | <b>Table S2</b> Rate constants (molecule <sup>-1</sup> cm <sup>3</sup> s <sup>-1</sup> ) in presence of the four catalysts calculated using results obtained from CCSD(T)/aug-cc-pVTZ//MP2/aug-cc-pVTZ level of theory | 6        |
| 4     | <b>Table S3</b> Concentration of the four catalysts (in molecules cm <sup>-3</sup> ) within 280 K to 320 K temperature range at 0 km altitude                                                                          | 7        |
| 5     | <b>Table S4</b> Effective rate constants (s <sup>-1</sup> ) in presence of the four catalysts within 280 K to 320 K temperature range at 0 km altitude                                                                 | 8        |
| 6     | <b>Table S5</b> Effective rate constants (s <sup>-1</sup> ) in presence of the four catalysts within 280 K to 320 K temperature range at 0 km altitude (MESMER)                                                        | 9        |
| 7     | <b>Table S6</b> Optimized geometries in Cartesian coordinates and normal mode frequencies of all species calculated at MP2/aug-cc-pVTZ level of theory                                                                 | 10       |
| 14    | <b>Table S7</b> Absolute energies (in Hartree) of all species involved in isomerization of MR calculated at the two different levels of theory                                                                         | 14       |
|       | <b>References</b>                                                                                                                                                                                                      | 15       |

## Rate Calculations:

Isomerization of MR can be written in terms of the bimolecular encounters between MR and catalyst, say X (X = WM, WD, FA and SA) to give HM, as:

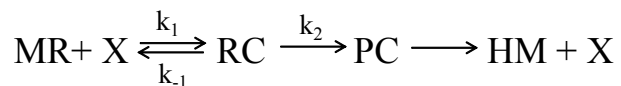

In the above reaction scheme RC is assumed to be in equilibrium with MR and X and subsequently RC undergoes unimolecular isomerization through TS to form PC. Under this assumption, the reaction rate ( $v$ ) can be expressed as:

$$v = \frac{k_1}{k_{-1}} k_2 [\text{MR}][\text{X}] = K_{eq} k_2 [\text{MR}][\text{X}] = k [\text{MR}][\text{X}]$$

$$\text{where } K_{eq} = \frac{k_1}{k_{-1}} \quad \text{and} \quad k = K_{eq} k_2$$

Where,  $K_{eq}$  = equilibrium constant of RCs ,

$k_2$  = rate constant for the unimolecular reaction of RCs leading to PCs.

$K_{eq}$  and  $k_2$  have been computed by using TST as shown below:

$$K_{eq} = \frac{Q_{RC}}{Q_{MR} \cdot Q_X} e^{\frac{-(E_{RC} - E_{MR})}{RT}}$$

$$k_2 = \sigma \Gamma \frac{k_B T Q_{TS}}{h Q_{RC}} e^{\frac{-(E_{TS} - E_{RC})}{RT}}$$

Where,  $Q$  = The product of electronic, translational, rotational and vibrational canonical partition functions of the respective species referenced to the zero-point energy (ZPE),

$E$  = ZPE corrected energies of the respective species,

= reaction path number or reaction degeneracy,

$\Gamma$  = tunneling correction for the reaction (it has been taken into account by assuming unsymmetrical Eckart barrier.<sup>y</sup>

$k_B$  = Boltzmann constant

$h$  = Planck constant

$T$  = temperature in Kelvin

$R$  = ideal gas constant.

The inherent assumption behind this approximation is that the time scale to established the equilibrium is significantly different (fast) as compared to the time scale of second step of reaction (unimolecular conversion). This assumption will work well if the catalyst molecules are present at sufficiently large concentration. Calculations of the rate constants were carried out by use of TheRate program package.<sup>1</sup>

It is evident from reaction rate ( $\nu$ ) equation that if all other conditions remain same, then  $k[X]$  (where,  $k$  is the rate constant and  $[X]$  is the concentration of the catalyst) can be considered as an effective rate constant:

$$k_{eff} = k[X]$$

To further assess the pre-equilibrium approximation, we have also carried out the rate calculations using MESMER software.<sup>2</sup> MESMER solves a multi grain master equation to obtain

the phenomenological rate constants which is known as Bartis-Widom phenomenological rate coefficients.

**Table S1** Relative energies (kcal mol<sup>-1</sup>) of all species with respect to the isolated reactants calculated using two different levels of theory

| Catalyst | Species          | MP2/aug-cc-pVTZ | CCSD(T)/aug-cc-pVTZ |
|----------|------------------|-----------------|---------------------|
|          | MR               | 0               | 0                   |
| None     | TS               | 30.0            | 32.7                |
|          | HM               | -14.1           | -8.7                |
| .....    |                  |                 |                     |
| WM       | MR-WM            | -5.1            | -5.2                |
|          | TS <sub>WM</sub> | 19.7            | 22.9                |
|          | HM-WM            | -20.8           | -15.4               |
| .....    |                  |                 |                     |
| WD       | MR-WD            | -8.1            | -8.4                |
|          | TS <sub>WD</sub> | 5.3             | 7.8                 |
|          | HM-WD            | -25.8           | -20.5               |
| .....    |                  |                 |                     |
| FA       | MR-FA            | -8.5            | -8.8                |
|          | TS <sub>FA</sub> | 3.8             | 4.4                 |
|          | HM-FA            | -24.1           | -18.9               |
| .....    |                  |                 |                     |
| SA       | MR-SA            | -11.4           | -11.8               |
|          | TS <sub>SA</sub> | 1.3             | 1.8                 |
|          | HM-SA            | -25.5           | -20.3               |

**Table S2** Rate constants ( $\text{molecule}^{-1} \text{ cm}^3 \text{ s}^{-1}$ ) in presence of the four catalysts calculated using results obtained from CCSD(T)/aug-cc-pVTZ//MP2/aug-cc-pVTZ level of theory

| Temperatures | WM                     | WD                     | FA                     | SA                     |
|--------------|------------------------|------------------------|------------------------|------------------------|
| 298          | $3.55 \times 10^{-29}$ | $2.82 \times 10^{-21}$ | $3.65 \times 10^{-16}$ | $2.80 \times 10^{-13}$ |
| 259          | $3.55 \times 10^{-29}$ | $2.82 \times 10^{-21}$ | $6.20 \times 10^{-16}$ | $1.28 \times 10^{-12}$ |
| 230          | $9.08 \times 10^{-31}$ | $8.46 \times 10^{-22}$ | $1.40 \times 10^{-15}$ | $7.13 \times 10^{-12}$ |
| 213          | $7.08 \times 10^{-32}$ | $3.39 \times 10^{-22}$ | $2.89 \times 10^{-15}$ | $2.74 \times 10^{-11}$ |
| 216          | $1.91 \times 10^{-32}$ | $2.15 \times 10^{-22}$ | $2.50 \times 10^{-15}$ | $2.11 \times 10^{-11}$ |
| 219          | $2.38 \times 10^{-32}$ | $2.30 \times 10^{-22}$ | $2.18 \times 10^{-15}$ | $1.65 \times 10^{-11}$ |
| 224          | $2.97 \times 10^{-32}$ | $2.49 \times 10^{-22}$ | $1.76 \times 10^{-15}$ | $1.11 \times 10^{-11}$ |
| 235          | $4.37 \times 10^{-32}$ | $2.85 \times 10^{-22}$ | $1.17 \times 10^{-15}$ | $5.06 \times 10^{-12}$ |
| 250          | $1.07 \times 10^{-31}$ | $3.94 \times 10^{-22}$ | $7.61 \times 10^{-16}$ | $2.04 \times 10^{-12}$ |
| 280          | $6.56 \times 10^{-30}$ | $1.64 \times 10^{-21}$ | $4.39 \times 10^{-16}$ | $5.16 \times 10^{-13}$ |
| 290          | $1.68 \times 10^{-29}$ | $2.22 \times 10^{-21}$ | $3.92 \times 10^{-16}$ | $3.61 \times 10^{-13}$ |
| 300          | $4.27 \times 10^{-29}$ | $2.98 \times 10^{-21}$ | $3.60 \times 10^{-16}$ | $2.64 \times 10^{-13}$ |
| 310          | $1.06 \times 10^{-28}$ | $3.96 \times 10^{-21}$ | $3.38 \times 10^{-16}$ | $2.00 \times 10^{-13}$ |
| 320          | $2.57 \times 10^{-28}$ | $5.20 \times 10^{-21}$ | $3.18 \times 10^{-16}$ | $1.56 \times 10^{-13}$ |

**Table S3** Concentration of the four catalysts (in molecules  $\text{cm}^{-3}$ ) within 280 K to 320 K temperature range at 0 km altitude. (% H stands for relative humidity)

| Catalyst        |                    | 280                   | 290                   | 298                   | 300                   | 310                   | 320                   |
|-----------------|--------------------|-----------------------|-----------------------|-----------------------|-----------------------|-----------------------|-----------------------|
| WM <sup>a</sup> | 20% H              | $5.16 \times 10^{16}$ | $9.56 \times 10^{16}$ | $1.55 \times 10^{17}$ | $1.72 \times 10^{17}$ | $2.92 \times 10^{17}$ | $4.70 \times 10^{17}$ |
|                 | 40% H              | $1.03 \times 10^{17}$ | $1.91 \times 10^{17}$ | $3.09 \times 10^{17}$ | $3.43 \times 10^{17}$ | $5.84 \times 10^{17}$ | $9.40 \times 10^{17}$ |
|                 | 60% H              | $1.55 \times 10^{17}$ | $2.87 \times 10^{17}$ | $4.64 \times 10^{17}$ | $5.15 \times 10^{17}$ | $8.77 \times 10^{17}$ | $1.41 \times 10^{18}$ |
|                 | 80% H              | $2.07 \times 10^{17}$ | $3.82 \times 10^{17}$ | $6.18 \times 10^{17}$ | $6.86 \times 10^{17}$ | $1.17 \times 10^{18}$ | $1.88 \times 10^{18}$ |
|                 | 100% H             | $2.58 \times 10^{17}$ | $4.78 \times 10^{17}$ | $7.73 \times 10^{17}$ | $8.58 \times 10^{17}$ | $1.46 \times 10^{18}$ | $2.35 \times 10^{18}$ |
| WD <sup>a</sup> | 20% H              | $8.18 \times 10^{12}$ | $2.36 \times 10^{13}$ | $5.44 \times 10^{13}$ | $6.50 \times 10^{13}$ | $1.63 \times 10^{14}$ | $3.71 \times 10^{14}$ |
|                 | 40% H              | $3.27 \times 10^{13}$ | $9.46 \times 10^{13}$ | $2.18 \times 10^{14}$ | $2.60 \times 10^{14}$ | $6.52 \times 10^{14}$ | $1.48 \times 10^{15}$ |
|                 | 60% H              | $7.36 \times 10^{13}$ | $2.13 \times 10^{14}$ | $4.90 \times 10^{14}$ | $5.85 \times 10^{14}$ | $1.46 \times 10^{15}$ | $3.33 \times 10^{15}$ |
|                 | 80% H              | $1.31 \times 10^{14}$ | $3.78 \times 10^{14}$ | $8.70 \times 10^{14}$ | $1.04 \times 10^{15}$ | $2.60 \times 10^{15}$ | $5.90 \times 10^{15}$ |
|                 | 100% H             | $2.04 \times 10^{14}$ | $5.91 \times 10^{14}$ | $1.36 \times 10^{15}$ | $1.62 \times 10^{15}$ | $4.06 \times 10^{15}$ | $9.24 \times 10^{15}$ |
| FA <sup>b</sup> | High               | $2.61 \times 10^{11}$ | $2.52 \times 10^{11}$ | $2.45 \times 10^{11}$ | $2.43 \times 10^{11}$ | $2.36 \times 10^{11}$ | $2.28 \times 10^{11}$ |
|                 | Average            | $2.02 \times 10^{10}$ | $1.95 \times 10^{10}$ | $1.90 \times 10^{10}$ | $1.89 \times 10^{10}$ | $1.83 \times 10^{10}$ | $1.77 \times 10^{10}$ |
|                 | Low                | $2.61 \times 10^{11}$ | $2.52 \times 10^{11}$ | $2.45 \times 10^{11}$ | $2.43 \times 10^{11}$ | $2.36 \times 10^{11}$ | $2.28 \times 10^{11}$ |
| SA <sup>c</sup> | $3.94 \times 10^8$ | $3.80 \times 10^8$    | $3.70 \times 10^8$    | $3.68 \times 10^8$    | $3.56 \times 10^8$    | $3.45 \times 10^8$    |                       |

<sup>a</sup> Reference 3 (concentration of WM and WD has directly been taken from this reference where the authors computed WD concentration from WM concentration and calculated equilibrium constant for WM to WD transformation)      <sup>b</sup> Reference 4      <sup>c</sup> Reference 5

**Table S4** Effective rate constants (s<sup>-1</sup>) in presence of the four catalysts within 280 K to 320 K temperature range at 0 km altitude calculated by TheRate. (% H stands for relative humidity)

| Catalyst | Conc.   | 280                    | 290                    | 298                    | 300                    | 310                    | 320                    |
|----------|---------|------------------------|------------------------|------------------------|------------------------|------------------------|------------------------|
| WM       | 20% H   | $3.38 \times 10^{-13}$ | $1.61 \times 10^{-12}$ | $5.50 \times 10^{-12}$ | $7.34 \times 10^{-12}$ | $3.10 \times 10^{-11}$ | $1.21 \times 10^{-10}$ |
|          | 40% H   | $6.76 \times 10^{-13}$ | $3.22 \times 10^{-12}$ | $1.10 \times 10^{-11}$ | $1.46 \times 10^{-11}$ | $6.19 \times 10^{-11}$ | $2.41 \times 10^{-10}$ |
|          | 60% H   | $1.02 \times 10^{-12}$ | $4.83 \times 10^{-12}$ | $1.65 \times 10^{-11}$ | $2.20 \times 10^{-11}$ | $9.30 \times 10^{-11}$ | $3.62 \times 10^{-10}$ |
|          | 80% H   | $1.36 \times 10^{-12}$ | $6.43 \times 10^{-12}$ | $2.19 \times 10^{-11}$ | $2.93 \times 10^{-11}$ | $1.24 \times 10^{-10}$ | $4.83 \times 10^{-10}$ |
|          | 100% H  | $1.69 \times 10^{-12}$ | $8.05 \times 10^{-12}$ | $2.74 \times 10^{-11}$ | $3.66 \times 10^{-11}$ | $1.55 \times 10^{-10}$ | $6.04 \times 10^{-10}$ |
| WD       | 20% H   | $1.34 \times 10^{-8}$  | $5.25 \times 10^{-8}$  | $1.53 \times 10^{-7}$  | $1.94 \times 10^{-7}$  | $6.46 \times 10^{-7}$  | $1.93 \times 10^{-6}$  |
|          | 40% H   | $5.37 \times 10^{-8}$  | $2.10 \times 10^{-7}$  | $6.14 \times 10^{-7}$  | $7.76 \times 10^{-7}$  | $2.58 \times 10^{-6}$  | $7.70 \times 10^{-6}$  |
|          | 60% H   | $1.21 \times 10^{-7}$  | $4.74 \times 10^{-7}$  | $1.38 \times 10^{-6}$  | $1.75 \times 10^{-6}$  | $5.78 \times 10^{-6}$  | $1.73 \times 10^{-5}$  |
|          | 80% H   | $2.15 \times 10^{-7}$  | $8.41 \times 10^{-7}$  | $2.45 \times 10^{-6}$  | $3.10 \times 10^{-6}$  | $1.03 \times 10^{-5}$  | $3.07 \times 10^{-5}$  |
|          | 100% H  | $3.35 \times 10^{-7}$  | $1.31 \times 10^{-6}$  | $3.83 \times 10^{-6}$  | $4.83 \times 10^{-6}$  | $1.61 \times 10^{-5}$  | $4.81 \times 10^{-5}$  |
| FA       | High    | $1.14 \times 10^{-4}$  | $9.87 \times 10^{-5}$  | $8.95 \times 10^{-5}$  | $8.75 \times 10^{-5}$  | $7.95 \times 10^{-5}$  | $7.26 \times 10^{-5}$  |
|          | Average | $8.87 \times 10^{-6}$  | $7.65 \times 10^{-6}$  | $6.94 \times 10^{-6}$  | $6.79 \times 10^{-6}$  | $6.17 \times 10^{-6}$  | $5.63 \times 10^{-6}$  |
|          | Low     | $1.14 \times 10^{-7}$  | $9.87 \times 10^{-8}$  | $8.95 \times 10^{-8}$  | $8.75 \times 10^{-8}$  | $7.95 \times 10^{-8}$  | $7.26 \times 10^{-8}$  |



|    |                       |                       |                       |                       |                       |                       |
|----|-----------------------|-----------------------|-----------------------|-----------------------|-----------------------|-----------------------|
| SA | $2.03 \times 10^{-4}$ | $1.37 \times 10^{-4}$ | $1.04 \times 10^{-4}$ | $9.69 \times 10^{-5}$ | $7.10 \times 10^{-5}$ | $5.37 \times 10^{-5}$ |
|----|-----------------------|-----------------------|-----------------------|-----------------------|-----------------------|-----------------------|

**Table S5** Effective rate constants ( $s^{-1}$ ) in presence of the four catalysts within 280 K to 320 K temperature range at 0 km altitude calculated by MESMER. (% H stands for relative humidity)

| Catalyst | Conc.   | 280                    | 290                    | 298                    | 300                    | 310                    | 320                    |
|----------|---------|------------------------|------------------------|------------------------|------------------------|------------------------|------------------------|
| WM       | 20% H   | $3.77 \times 10^{-13}$ | $1.74 \times 10^{-12}$ | $5.81 \times 10^{-12}$ | $7.71 \times 10^{-12}$ | $3.19 \times 10^{-11}$ | $1.22 \times 10^{-10}$ |
|          | 40% H   | $7.52 \times 10^{-13}$ | $3.47 \times 10^{-12}$ | $1.16 \times 10^{-11}$ | $1.54 \times 10^{-11}$ | $6.34 \times 10^{-11}$ | $2.45 \times 10^{-10}$ |
|          | 60% H   | $1.13 \times 10^{-12}$ | $5.21 \times 10^{-12}$ | $1.74 \times 10^{-11}$ | $2.31 \times 10^{-11}$ | $9.59 \times 10^{-11}$ | $3.67 \times 10^{-10}$ |
|          | 80% H   | $1.51 \times 10^{-12}$ | $6.94 \times 10^{-12}$ | $2.32 \times 10^{-11}$ | $3.08 \times 10^{-11}$ | $1.28 \times 10^{-10}$ | $4.89 \times 10^{-10}$ |
|          | 100% H  | $1.88 \times 10^{-12}$ | $8.68 \times 10^{-12}$ | $2.9 \times 10^{-11}$  | $3.85 \times 10^{-11}$ | $1.6 \times 10^{-10}$  | $6.11 \times 10^{-10}$ |
| WD       | 20% H   | $1.31 \times 10^{-8}$  | $5.05 \times 10^{-8}$  | $1.46 \times 10^{-7}$  | $1.85 \times 10^{-7}$  | $6.09 \times 10^{-7}$  | $1.80 \times 10^{-6}$  |
|          | 40% H   | $5.22 \times 10^{-8}$  | $2.02 \times 10^{-7}$  | $5.86 \times 10^{-7}$  | $7.39 \times 10^{-7}$  | $2.44 \times 10^{-6}$  | $7.20 \times 10^{-6}$  |
|          | 60% H   | $1.18 \times 10^{-7}$  | $4.56 \times 10^{-7}$  | $1.32 \times 10^{-6}$  | $1.66 \times 10^{-6}$  | $5.45 \times 10^{-6}$  | $1.62 \times 10^{-5}$  |
|          | 80% H   | $2.09 \times 10^{-7}$  | $8.09 \times 10^{-7}$  | $2.34 \times 10^{-6}$  | $2.95 \times 10^{-6}$  | $9.71 \times 10^{-6}$  | $2.87 \times 10^{-5}$  |
|          | 100% H  | $3.26 \times 10^{-7}$  | $1.26 \times 10^{-6}$  | $3.65 \times 10^{-6}$  | $4.6 \times 10^{-6}$   | $1.51 \times 10^{-5}$  | $4.49 \times 10^{-5}$  |
| FA       | High    | $7.93 \times 10^{-5}$  | $7.44 \times 10^{-5}$  | $7.1 \times 10^{-5}$   | $7.12 \times 10^{-5}$  | $6.71 \times 10^{-5}$  | $6.44 \times 10^{-5}$  |
|          | Average | $6.14 \times 10^{-6}$  | $5.76 \times 10^{-6}$  | $5.5 \times 10^{-6}$   | $5.46 \times 10^{-6}$  | $5.20 \times 10^{-6}$  | $5.00 \times 10^{-6}$  |
|          | Low     | $7.93 \times 10^{-8}$  | $7.44 \times 10^{-8}$  | $7.1 \times 10^{-8}$   | $7.12 \times 10^{-8}$  | $6.71 \times 10^{-8}$  | $6.44 \times 10^{-8}$  |

|    |                       |                       |                       |                      |                       |                       |
|----|-----------------------|-----------------------|-----------------------|----------------------|-----------------------|-----------------------|
| SA | $2.95 \times 10^{-5}$ | $2.66 \times 10^{-5}$ | $2.45 \times 10^{-5}$ | $2.4 \times 10^{-5}$ | $2.16 \times 10^{-5}$ | $1.95 \times 10^{-5}$ |
|----|-----------------------|-----------------------|-----------------------|----------------------|-----------------------|-----------------------|

**Table S6** Optimized geometries in Cartesian coordinates and normal mode frequencies of all species calculated at MP2/aug-cc-pVTZ level of theory

| Species | Cartesian coordinate (Å) |           |           | Vibrational frequencies (cm <sup>-1</sup> ) |           |           |           |
|---------|--------------------------|-----------|-----------|---------------------------------------------|-----------|-----------|-----------|
| MR      | C                        | 0.581872  | 0.000089  | -0.010498                                   |           |           |           |
|         | H                        | 0.865280  | -0.004096 | 1.050892                                    | 807.7226  | 968.7007  | 1127.056  |
|         | H                        | 0.999450  | 0.903630  | -0.458822                                   | 1415.008  | 1432.323  | 1539.404  |
|         | H                        | 0.999079  | -0.900437 | -0.465240                                   | 3006.008  | 3090.193  | 3131.184  |
|         | O                        | -0.794380 | 0.000046  | -0.007980                                   |           |           |           |
| HM      | C                        | 0.684714  | 0.027438  | -0.066480                                   |           |           |           |
|         | H                        | 1.113909  | 0.987547  | 0.173444                                    | 433.6348  | 621.2987  | 1067.206  |
|         | H                        | 1.229154  | -0.882854 | 0.109015                                    | 1212.753  | 1367.984  | 1509.170  |
|         | O                        | -0.670357 | -0.125781 | 0.021718                                    | 3194.145  | 3343.541  | 3854.749  |
|         | H                        | -1.088491 | 0.736930  | -0.057321                                   |           |           |           |
| TS      | C                        | -0.628082 | 0.000001  | 0.006767                                    |           |           |           |
|         | H                        | -1.151053 | 0.934246  | -0.171669                                   | -2108.122 | 844.6455  | 1031.746  |
|         | H                        | -1.151052 | -0.934234 | -0.171728                                   | 1149.538  | 1191.385  | 1502.643  |
|         | O                        | 0.742190  | 0.000004  | -0.084151                                   | 2602.608  | 3112.367  | 3229.723  |
|         | H                        | 0.133075  | -0.000051 | 0.976004                                    |           |           |           |
| MR-WM   | C                        | -1.304759 | -0.496026 | -0.011360                                   |           |           |           |
|         | H                        | -0.603971 | -1.187156 | -0.482799                                   | 69.9095   | 6.5984    | 113.9642  |
|         | H                        | -2.305564 | -0.564287 | -0.438409                                   | 179.4596  | 350.26    | 437.0240  |
|         | H                        | -1.365238 | -0.771375 | 1.050999                                    | 935.9952  | 1025.52   | 1123.5392 |
|         | O                        | -0.824776 | 0.798388  | -0.008100                                   | 1411.271  | 1435.192  | 1535.8440 |
|         | H                        | 1.119029  | 0.407694  | 0.017476                                    | 1642.0936 | 3004.88   | 3097.0467 |
|         | H                        | 2.646450  | 0.355046  | -0.003530                                   | 3149.0056 | 3727.8958 | 3915.5858 |
|         | O                        | 1.867007  | -0.206359 | -0.001346                                   |           |           |           |
| HM-WM   | C                        | 1.594154  | 0.453076  | -0.049929                                   |           |           |           |
|         | H                        | 2.647667  | 0.262332  | 0.057840                                    | 64.1035   | 80.9239   | 154.5240  |
|         | H                        | 1.164833  | 1.393885  | 0.260395                                    | 185.1505  | 236.92    | 288.9752  |
|         | O                        | 0.817172  | -0.661979 | -0.001150                                   | 584.6835  | 774.30    | 1116.4078 |
|         | H                        | -2.475492 | -0.249859 | 0.639227                                    | 1233.4945 | 1436.24   | 1508.4694 |
|         | H                        | -0.114948 | -0.389470 | 0.012611                                    | 1629.4883 | 3183.95   | 3330.1810 |
|         | H                        | -2.324381 | 0.137155  | -0.828992                                   | 3666.6407 | 3813.7576 | 3935.3650 |
|         | O                        | -1.874998 | 0.177916  | 0.020961                                    |           |           |           |

|                  |   |           |           |           |            |           |           |
|------------------|---|-----------|-----------|-----------|------------|-----------|-----------|
| TS <sub>MM</sub> | C | -1.006422 | 0.515997  | 0.008835  |            |           |           |
|                  | H | 0.363026  | 0.769681  | 0.015035  | -1381.2761 | 188.7210  | 373.6247  |
|                  | H | -1.340918 | 1.026908  | 0.923637  | 402.1024   | 553.3765  | 617.1818  |
|                  | H | -1.273163 | 1.033722  | -0.925034 | 821.99     | 1138.1143 | 1197.4839 |
|                  | O | -0.828801 | -0.748636 | 0.010748  | 1211.1802  | 1375.31   | 1519.3544 |
|                  | H | 0.860446  | -0.683665 | -0.087404 | 1597.7765  | 1713.9734 | 2960.7275 |
|                  | H | 1.987319  | 0.057738  | 0.739278  | 3041.2434  | 3088.2784 | 3817.0573 |
|                  | O | 1.509028  | 0.086090  | -0.100563 |            |           |           |
| MR-WD            | C | 1.624684  | -0.646780 | 0.278440  |            |           |           |
|                  | H | 0.804341  | -1.286595 | -0.080653 | 49.1017    | 65.67     | 66.66     |
|                  | H | 1.429840  | -0.490348 | 1.342557  | 120.7245   | 155.12    | 197.34    |
|                  | H | 2.584594  | -1.132864 | 0.108322  | 199.9369   | 211.02    | 357.20    |
|                  | O | 1.495613  | 0.535310  | -0.419639 | 397.2183   | 574.04    | 656.67    |
|                  | H | -1.423292 | 2.153358  | -0.328180 | 843.5776   | 1042.37   | 1178.97   |
|                  | H | -0.163054 | 1.336766  | -0.008796 | 1394.6224  | 1455.05   | 1529.90   |
|                  | H | -1.597196 | -0.355781 | -0.013842 | 1646.36    | 1665.91   | 2986.39   |
|                  | H | -2.365144 | -1.677582 | 0.120264  | 3081.95    | 3148.86   | 3617.99   |
|                  | O | -1.098996 | 1.445287  | 0.235062  | 3659.85    | 3900.18   | 3909.37   |
|                  | O | -1.523891 | -1.313881 | -0.166712 |            |           |           |
| HM-WD            | C | 1.577060  | -0.508740 | 0.410319  |            |           |           |
|                  | H | -0.420104 | -1.413993 | -0.124840 | 78.43      | 105.78    | 142.10    |
|                  | H | 1.208372  | -0.314004 | 1.409347  | 200.42     | 216.04    | 228.7773  |
|                  | H | 2.474859  | -1.088068 | 0.269558  | 274.09     | 281.06    | 320.8114  |
|                  | O | 1.371977  | 0.433125  | -0.539185 | 398.46     | 550.56    | 699.1170  |
|                  | H | -1.583649 | 2.017965  | -0.260571 | 760.90     | 899.91    | 1140.4513 |
|                  | H | 0.583193  | 0.957832  | -0.288149 | 1251.08    | 1478.58   | 1510.4094 |
|                  | H | -1.443934 | 0.524452  | 0.106303  | 1632.48    | 1651.60   | 3159.2826 |
|                  | H | -1.763657 | -1.978221 | 0.348706  | 3306.63    | 3489.52   | 3602.5402 |
|                  | O | -1.055633 | 1.406411  | 0.260073  | 3669.16    | 3894.81   | 3898.1470 |
|                  | O | -1.381023 | -1.296227 | -0.211171 |            |           |           |
| TS <sub>WD</sub> | C | -1.552565 | 0.225967  | 0.177216  |            |           |           |
|                  | H | -0.474998 | 1.003292  | -0.016289 | -1075.77   | 71.22     | 186.2543  |
|                  | H | -1.632392 | 0.400059  | 1.263376  | 314.6233   | 318.9303  | 349.1730  |
|                  | H | -2.319457 | 0.738103  | -0.418138 | 387.4418   | 470.8772  | 539.1420  |
|                  | O | -1.092684 | -0.893167 | -0.241631 | 582.0361   | 599.9233  | 907.2542  |
|                  | H | 1.889932  | -1.540721 | -0.454687 | 1072.7153  | 1136.1818 | 1198.7408 |
|                  | H | 0.464068  | -1.171925 | 0.082117  | 1241.9055  | 1352.1661 | 1508.8484 |
|                  | H | 1.244853  | 0.563144  | -0.089663 | 1586.5513  | 1647.0529 | 1694.1074 |
|                  | H | 1.060237  | 2.003150  | 0.551133  | 2876.3894  | 2947.9467 | 3052.1656 |
|                  | O | 1.444328  | -0.984749 | 0.191039  | 3101.5656  | 3831.9969 | 3884.0190 |
|                  | O | 0.783749  | 1.459054  | -0.197052 |            |           |           |

|                  |          |           |           |           |            |           |           |
|------------------|----------|-----------|-----------|-----------|------------|-----------|-----------|
| MR-FA            | C        | -2.052698 | 0.524993  | 0.076215  |            |           |           |
|                  | H        | -1.306125 | 1.259131  | -0.228755 | 40.3170    | 86.4580   | 125.6243  |
|                  | H        | -2.151417 | 0.606489  | 1.168719  | 155.2585   | 180.6970  | 209.6524  |
|                  | H        | -3.031596 | 0.694212  | -0.370856 | 672.2190   | 807.7323  | 937.8172  |
|                  | O        | -1.604893 | -0.764896 | -0.134572 | 1042.9286  | 1079.5520 | 1142.664  |
|                  | C        | 1.722305  | 0.115209  | 0.020609  | 1202.5510  | 1375.1448 | 1410.067  |
|                  | O        | 1.153459  | -1.089016 | 0.059260  | 1430.1417  | 1441.4301 | 1525.887  |
|                  | H        | 0.176890  | -0.969956 | -0.010754 | 1771.4689  | 2998.9995 | 3100.006  |
|                  | O        | 1.137058  | 1.171977  | -0.078662 | 3109.3138  | 3161.6177 | 3426.185  |
|                  | H        | 2.809616  | 0.024391  | 0.092494  |            |           |           |
| MA-FA            | C        | -1.800717 | 0.523674  | 0.354276  |            |           |           |
|                  | H        | 0.157259  | 1.114783  | -0.120741 | 92.1393    | 132.5318  | 158.0052  |
|                  | H        | -1.429815 | 0.444542  | 1.369361  | 177.8394   | 210.0715  | 335.1436  |
|                  | H        | -2.664446 | 1.132478  | 0.144673  | 671.4281   | 745.0239  | 801.0968  |
|                  | O        | -1.676894 | -0.553924 | -0.455107 | 830.7942   | 1075.8084 | 1116.497  |
|                  | C        | 1.608167  | -0.096982 | 0.008791  | 1198.0583  | 1248.4473 | 1359.648  |
|                  | O        | 0.945221  | -1.088904 | 0.243429  | 1420.7062  | 1439.6606 | 1509.519  |
|                  | H        | -0.863789 | -1.024344 | -0.190475 | 1756.5087  | 3132.0642 | 3152.884  |
|                  | O        | 1.138913  | 1.127501  | -0.204314 | 3308.5377  | 3430.4857 | 3603.395  |
|                  | H        | 2.698165  | -0.105002 | -0.053284 |            |           |           |
| TS <sub>FA</sub> | C        | -1.686233 | 0.469583  | 0.226401  |            |           |           |
|                  | H        | -0.558927 | 0.990393  | -0.056682 | -1581.0941 | 111.5960  | 228.2984  |
|                  | H        | -1.532307 | 0.575994  | 1.312175  | 261.0540   | 389.4417  | 415.6065  |
|                  | H        | -2.495433 | 1.074226  | -0.184142 | 544.6929   | 760.9463  | 1013.599  |
|                  | O        | -1.456043 | -0.683456 | -0.308575 | 1067.4046  | 1162.5465 | 1198.660  |
|                  | C        | 1.495744  | 0.080996  | 0.008453  | 1242.5259  | 1294.9177 | 1317.449  |
|                  | O        | 0.958896  | -1.091916 | 0.150798  | 1406.1732  | 1476.9912 | 1541.168  |
|                  | H        | -0.077257 | -1.042473 | 0.019649  | 1595.5030  | 1743.4637 | 2359.819  |
|                  | O        | 0.899805  | 1.154806  | -0.162035 | 2975.1113  | 3133.1158 | 3138.370  |
|                  | H        | 2.585598  | 0.062917  | 0.058366  |            |           |           |
| MR-SA            | C        | -2.915023 | 0.496359  | 0.011898  |            |           |           |
|                  | H        | -2.522735 | 1.068147  | -0.830346 | 21.7927    | 47.5046   | 105.8865  |
|                  | H        | -2.494425 | 0.965032  | 0.913268  | 108.4937   | 137.4555  | 224.7016  |
|                  | H        | -4.002036 | 0.510538  | 0.064505  | 267.1392   | 376.4545  | 424.1798  |
|                  | O        | -2.415190 | -0.790996 | 0.023246  | 507.4708   | 536.6131  | 546.5106  |
|                  | O        | 0.131338  | -0.989986 | -0.786004 | 767.1543   | 827.4224  | 903.2702  |
|                  | H        | -0.813612 | -0.942525 | -0.472221 | 911.0901   | 1035.7410 | 1151.8127 |
|                  | O        | 0.076530  | 1.252092  | 0.228191  | 1162.49    | 1212.7792 | 1324.3341 |
|                  | S        | 0.951852  | 0.149227  | -0.071781 | 1391.2265  | 1437.2317 | 1456.8997 |
|                  | O        | 1.283218  | -0.502939 | 1.357044  | 1528.8446  | 3002.8137 | 3100.7217 |
| H                | 2.054365 | -1.079815 | 1.241329  | 3168.1656 | 3229.8462  | 3767.1996 |           |
| O                | 2.178972 | 0.295933  | -0.802405 |           |            |           |           |

|                  |   |           |           |           |            |           |           |
|------------------|---|-----------|-----------|-----------|------------|-----------|-----------|
| HM-SA            | C | 2.510875  | 0.680962  | 0.050198  |            |           |           |
|                  | H | 0.795983  | 0.576275  | 1.022455  | 39.5454    | 92.0279   | 133.9790  |
|                  | H | 2.004345  | 1.188305  | -0.763026 | 157.3991   | 193.4639  | 273.6392  |
|                  | H | 3.315531  | 1.172627  | 0.572400  | 339.8196   | 382.3827  | 424.2778  |
|                  | O | 2.654199  | -0.660886 | -0.028989 | 503.4366   | 536.7415  | 547.1142  |
|                  | O | -0.008152 | -0.880376 | -0.871317 | 657.9004   | 732.0890  | 831.6837  |
|                  | H | 1.898349  | -1.011354 | -0.529868 | 851.1883   | 901.8792  | 1106.0538 |
|                  | O | -0.139467 | 0.345177  | 1.273393  | 1161.4534  | 1207.9206 | 1254.4039 |
|                  | S | -0.907671 | -0.146997 | -0.013395 | 1271.2194  | 1407.9641 | 1454.8035 |
|                  | O | -1.175219 | 1.21807   | -0.807261 | 1508.6361  | 3147.9997 | 3237.1761 |
|                  | O | -2.156985 | -0.684880 | 0.436762  | 3304.7289  | 3686.2906 | 3759.2855 |
| TS <sub>SA</sub> | C | -2.450647 | 0.565668  | -0.020888 |            |           |           |
|                  | H | -1.457484 | 0.758118  | -0.733978 | -1703.5797 | 35.0188   | 114.6252  |
|                  | H | -2.050967 | 1.184776  | 0.796835  | 211.4644   | 219.0340  | 337.9861  |
|                  | H | -3.358948 | 0.928019  | -0.493884 | 378.8078   | 409.2606  | 452.8162  |
|                  | O | -2.324418 | -0.723092 | 0.097017  | 479.6697   | 548.1197  | 562.8545  |
|                  | O | -0.008582 | -1.075531 | 0.623297  | 675.8058   | 818.4387  | 900.9640  |
|                  | H | -1.135673 | -0.952674 | 0.453688  | 1002.4573  | 1074.7410 | 1151.5177 |
|                  | O | 0.036471  | 0.650509  | -1.128048 | 1196.6273  | 1220.2323 | 1253.6144 |
|                  | S | 0.844939  | -0.052198 | -0.120732 | 1324.6264  | 1365.2764 | 1403.8972 |
|                  | O | 2.110185  | -0.610565 | -0.504571 | 1519.71    | 1602.4591 | 1743.6568 |
|                  | O | 1.104439  | 1.098098  | 0.975020  | 2993.2428  | 3186.3530 | 3765.2460 |
| WM               | O | 0.000000  | 0.000000  | 0.118189  |            |           |           |
|                  | H | 0.000000  | 0.758025  | -0.472754 | 1627.7612  | 3824.7050 | 3950.6090 |
|                  | H | 0.000000  | -0.758025 | -0.472754 |            |           |           |
| WD               | O | -1.385097 | 0.000601  | 0.110496  |            |           |           |
|                  | H | -1.746597 | -0.763119 | -0.349950 | 127.0098   | 147.1099  | 154.9316  |
|                  | H | -1.747854 | 0.758911  | -0.357831 | 184.1613   | 360.4078  | 630.2965  |
|                  | O | 1.512857  | -0.000695 | -0.121976 | 1629.3162  | 1650.2617 | 3718.7825 |
|                  | H | 0.559405  | 0.000611  | 0.048517  | 3813.9011  | 3915.1798 | 3935.2566 |
| FA               | C | 0.000000  | 0.422392  | 0.000000  |            |           |           |
|                  | H | -0.376774 | 1.447695  | 0.000000  | 625.952    | 674.778   | 1058.557  |
|                  | O | 1.163418  | 0.108154  | 0.000000  | 1130.131   | 1301.324  | 1408.906  |
|                  | O | -1.034994 | -0.439528 | 0.000000  | 1794.039   | 3125.306  | 3741.349  |
|                  | H | -0.650614 | -1.331055 | 0.000000  |            |           |           |
| SA               | H | 1.683905  | -0.014800 | 1.107699  |            |           |           |
|                  | O | 0.659484  | 1.084346  | -0.827065 | 242.8958   | 328.1320  | 367.2603  |
|                  | O | 1.034771  | -0.687872 | 0.848480  | 431.4837   | 485.9993  | 531.5543  |
|                  | S | 0.000058  | 0.000064  | -0.159243 | 542.2237   | 821.4432  | 873.6608  |
|                  | O | -1.035291 | 0.687175  | 0.848517  | 1155.1241  | 1170.0433 | 1219.2879 |
|                  | O | -1.684504 | 0.013827  | 1.106801  | 1469.2375  | 3760.6034 | 3764.8107 |

**Table S7** Absolute energies (in Hartree) of all species involved in isomerization of MR calculated at the two different levels of theory

| Species          | MP2/aug-cc-pVTZ | CCSD(T)/aug-cc-pVTZ |
|------------------|-----------------|---------------------|
| MR               | -114.84396077   | -114.885062         |
| TS               | -114.79613291   | -114.8328949        |
| HM               | -114.86634476   | -114.8988607        |
| MR-WM            | -191.18101248   | -191.2357163        |
| TS <sub>WM</sub> | -191.14159052   | -191.1909453        |
| HM-WM            | -191.20605728   | -191.2519222        |
| MR-WD            | -267.52313693   | -267.5914694        |
| TS <sub>WD</sub> | -267.50181805   | -267.5656003        |
| HM-WD            | -267.55128696   | -267.6106135        |
| MR-FA            | -304.34423196   | -304.4168392        |
| TS <sub>FA</sub> | -304.32465040   | -304.395769         |
| HM-FA            | -304.36904354   | -304.4328489        |
| MR-SA            | -814.28172138   | -814.3693943        |
| TS               | -814.26141531   | -814.3478167        |
| HM-SA            | -814.30415433   | -814.3829675        |

## Reference:

1. (a) S. Zhang and T. N. Truong, VKLab (version 1.0), University of Utah, 2001;  
(b) W. T. Duncan, R. L. Bell and T. N. Truong, *J. Comput. Chem.*, 1998, **19**, 1039.
2. a) D. R. Glowacki, C. H. Liang, C. Morley, M. J. Pilling and S. H. Robertson, *J. Phys. Chem. A*, 2012, **116**, 9545.  
b) S. H. Robertson, D. R. Glowacki, C. H. Liang, C. Morley, R. Shannon, M. Blitz, P. W. Seakins, M. J. Pilling, *MESMER (Master Equation Solver for Multi-Energy Well Reactions)*, 2008-2013; an object oriented C++ program implementing master equation methods for gas phase reactions with arbitrary multiple wells. <http://sourceforge.net/projects/mesmer>
3. J. M. Anglada, G. J. Hoffman, L. V. Slipchenko, M. M. Costa, M. F. Ruiz-López and J. S. Francisco, *J. Phys. Chem. A*, 2013, **117**, 10381.
4. A. Razavi, F. Karagulian, L. Clarisse, D. Hurtmans, P. F. Coheur, C. Clerbaux, J. F. Müller and T. Stavrou, *Atmos. Chem. Phys.*, 2011, **11**, 857.
5. R. P. Turco, P. Hamill, O. B. Toon, R. C. Whitten and C. S. Kiang, *J. Atmos. Sci.*, 1979, **36**, 699.
